# Supplementary material
Source: publisher figshare collection journal article supplement (https://acs.figshare.com/ndownloader/files/20174564)
Supplement: Supplementary file 1 [file 20174564]

*Supporting information*

# **Resistive Water Sensors Based on PEDOT: PSS-g-PEGME copolymer and Laser Treatment for Water Ingress Monitoring Systems**

**Seongin Hong<sup>1,†</sup>, Jung Joon Lee<sup>1,†</sup>, Srinivas Gandla<sup>1</sup>, Junwoo Park<sup>1</sup>, Haewon Cho<sup>1</sup>, and Sunkook Kim<sup>1,\*</sup>**

<sup>1</sup> School of Advanced Materials Science & Engineering, Sungkyunkwan University, Suwon, 440-745, Republic of Korea; [seonkuk@skku.edu](mailto:seonkuk@skku.edu).

**Keywords:** resistive water sensor, water ingress monitoring systems, PEDOT: PSS, water resistance, laser treatment

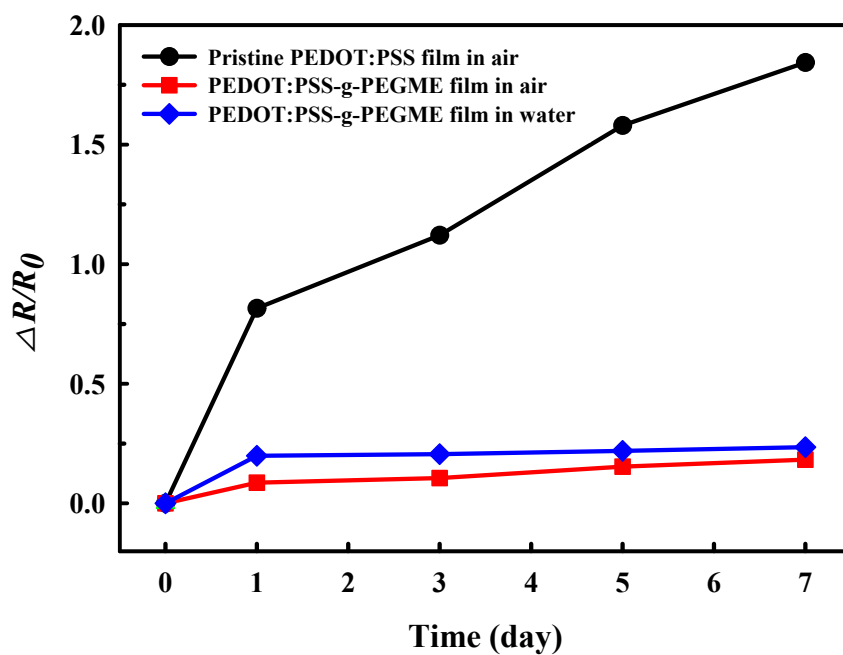

Figure S1. The relative resistance changes of pristine PEDOT:PSS and PEDOT:PSS-g-PEGME copolymer film over time exposed to air or water.

Table S1. Statistical data of result extracted from Figure 5a.

|                           |                    | Water level (cm) |      |      |      |      |
|---------------------------|--------------------|------------------|------|------|------|------|
|                           |                    | 0                | 1    | 2    | 3    | 4    |
| Current ( $\mu\text{A}$ ) | Average            | 0.13             | 0.71 | 1.26 | 1.94 | 2.74 |
|                           | Standard deviation | 0.02             | 0.08 | 0.04 | 0.02 | 0.03 |
